# Supplementary figures and images for: Large synteny blocks revealed between Caenorhabditis elegans and Caenorhabditis briggsae genomes using OrthoCluster
Source: Springer Nature journal article supplement (doi:10.1186/1471-2164-11-516), 2010-01-01

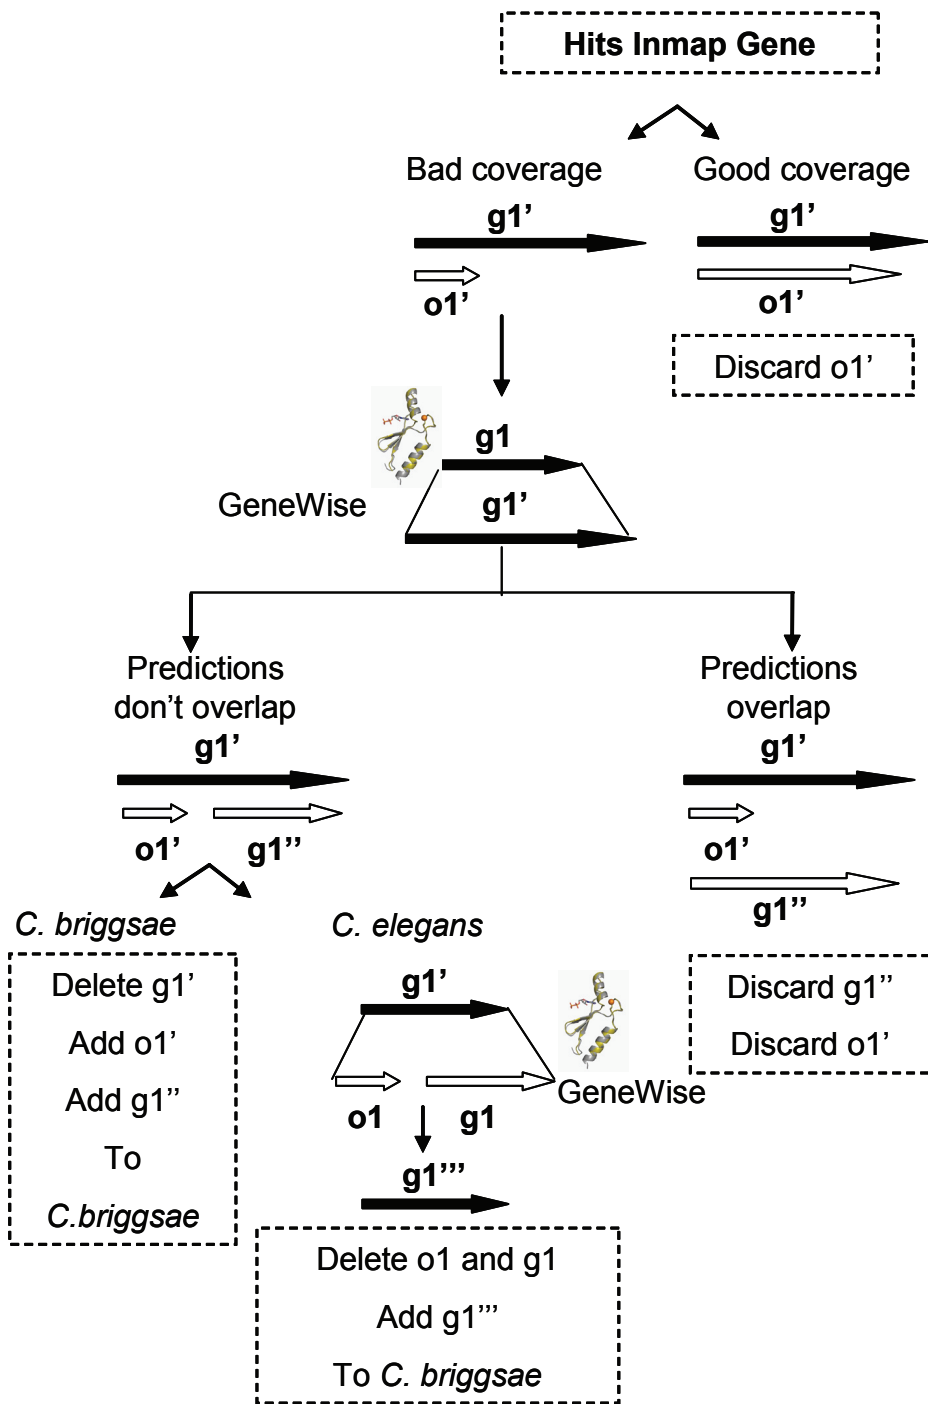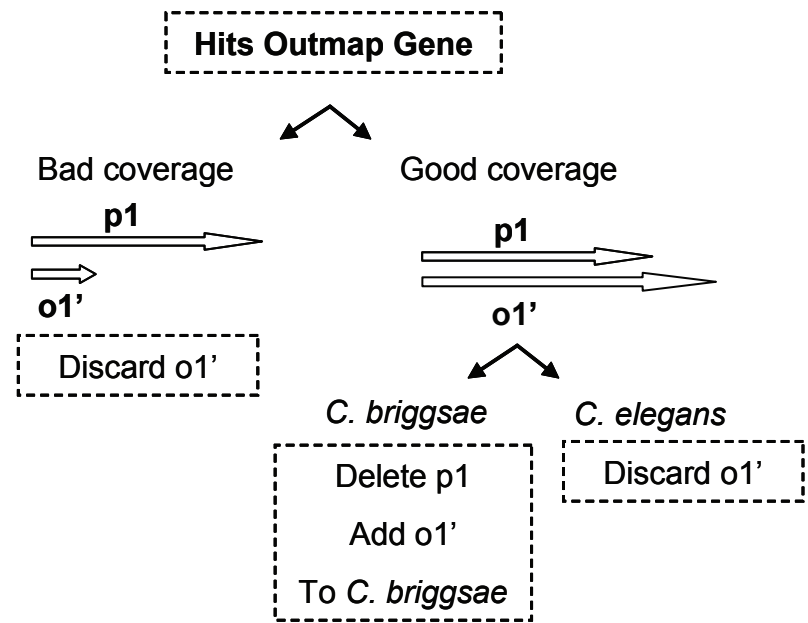

Supplement: Additional file 14 [file 1471-2164-11-516-s14.pdf]
